# Supplementary material for: One-step in situ synthesis of ultrathin tungsten oxide@carbon nanowire webs as an anode material for high performance
Source: Royal Society of Chemistry journal article supplement (doi:10.1039/c4ta06262k), 2015-01-01
Supplement: c4ta06262k1.pdf [file c4ta06262k1.pdf]

### Supporting information

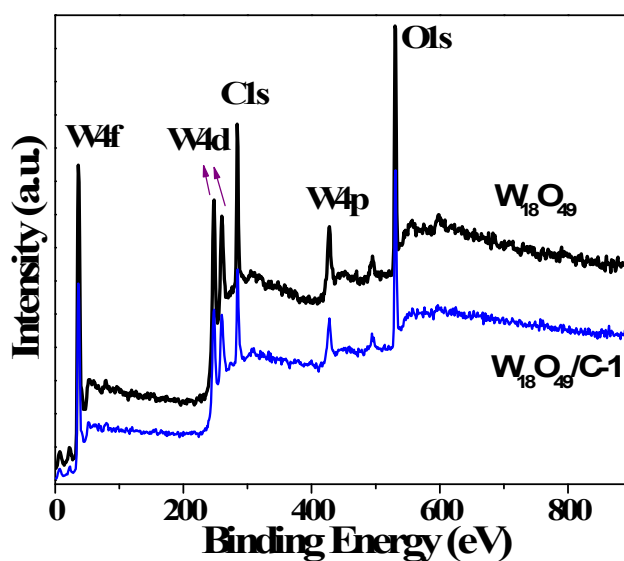

Fig. S1 XPS spectra of  $W_{18}O_{49}$  and  $W_{18}O_{49}/C-1$ .

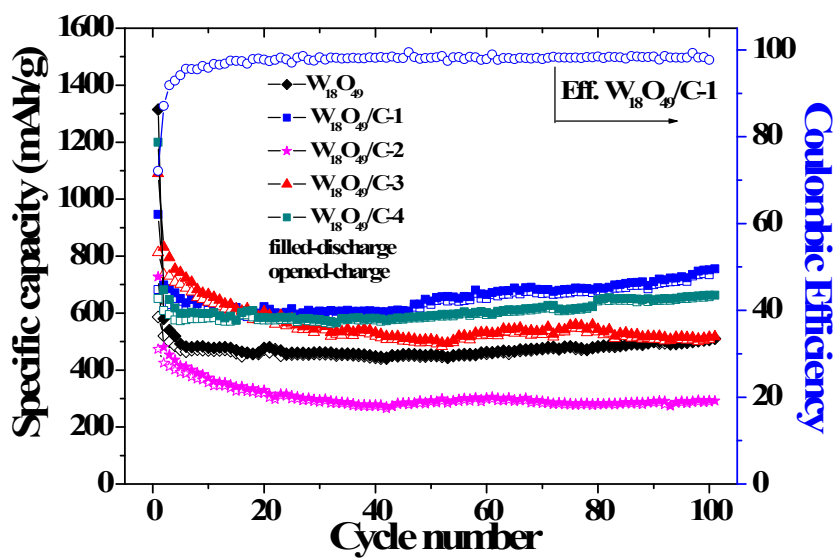

Fig. S2 Cycling stability of  $W_{18}O_{49}$ ,  $W_{18}O_{49}/C-1$ ,  $W_{18}O_{49}/C-2$ ,  $W_{18}O_{49}/C-3$  and  $W_{18}O_{49}/C-4$  at a rate of  $200 \text{ mA g}^{-1}$ .  $W_{18}O_{49}/C-4$  was prepared under the same condition with  $W_{18}O_{49}/C-1$  except  $0.3 \text{ g D-glucose}$ .
